# Supplementary material for: COVID-19 isolation and containment strategies for ships: Lessons from the USS Theodore Roosevelt outbreak
Source: bioRxiv or medRxiv preprint supplement (doi:10.1101/2020.11.05.20226712), 2020-11-07
Supplement: Supplementary file [file media-1.pdf]

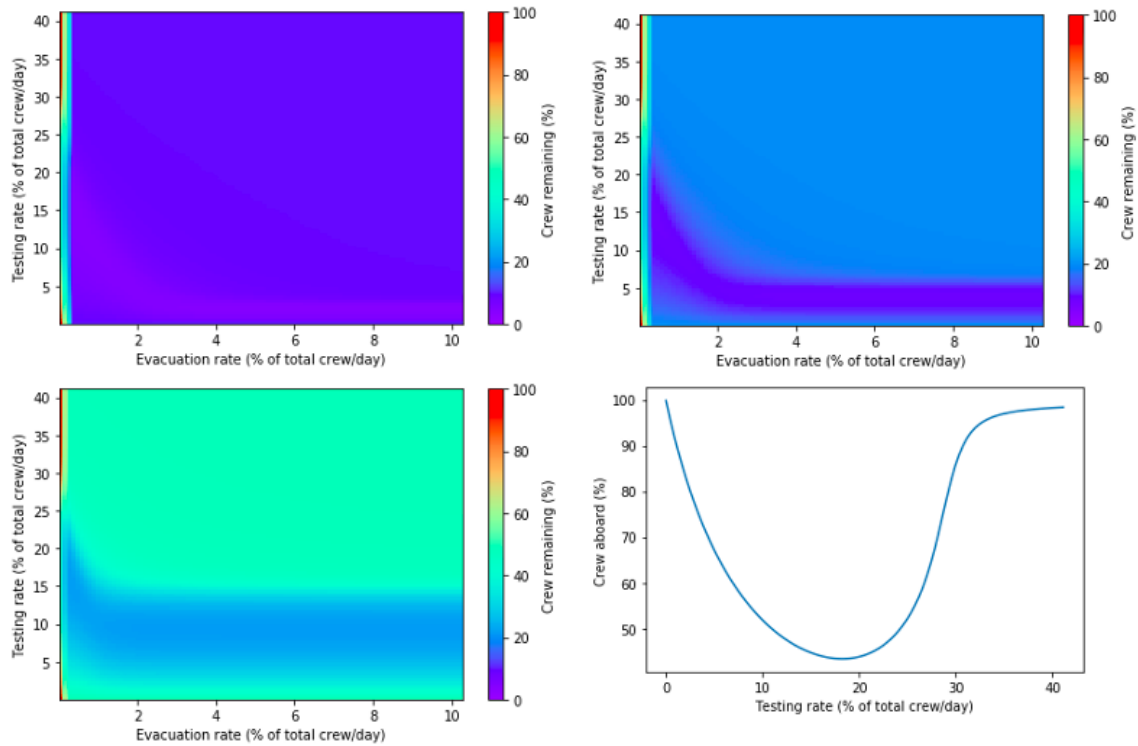

**Fig S1.** Target skeleton crew is unattainable when testing is insufficient or evacuation is too slow. Final crew remaining on board and out of isolation for a target crew of A) 10%, B) 20%, C) 50%, and D) 100% of the initial population.
